# Supplementary material for: Grammatical Comprehension in Italian Children with Autism Spectrum Disorder
Source: Brain Sci. 2020 Aug 2;10(8):510. doi: 10.3390/brainsci10080510 (PMC7464622; doi:10.3390/brainsci10080510)
Supplement: Supplementary file 1 [file brainsci-10-00510-s001.pdf]

## Supplemental Material

**Table 1.** The Test of Grammatical Comprehension for Children TCGB [33].

| Structures                | Number of Items | Sub-Categories                                                                                                                                                                                                                                                                                                                                                              |
|---------------------------|-----------------|-----------------------------------------------------------------------------------------------------------------------------------------------------------------------------------------------------------------------------------------------------------------------------------------------------------------------------------------------------------------------------|
| Locative items            | 14              | Topological (under/over; in/out; beside/far)<br>Projectives (front/back, from/to, between)                                                                                                                                                                                                                                                                                  |
| Inflectional items        | 16              | Nominal (number → singular/plural; gender → male/female)<br>Verbal (number → singular/plural; tense → present/past/future)<br>Possessive (singular/plural)                                                                                                                                                                                                                  |
| Affirmative active items  | 10              | SV: Subject Verb (i.e. “The mother is doing the washing”)<br>Reversible probable (i.e. “The mother is combing the little girl’s hair”)<br>Reversible neutral (i.e. “The little boy is pushing the little girl”)<br>Reversible improbable (i.e. “The little boy feeds the mother”)<br>Reversible with subject object inanimate-animate (i.e. “The paper is burning the boy”) |
| Negative active items     | 6               | SV: Subject Verb (i.e. “The little boy isn’t sleeping”)<br>SVO irreversible: Subject Verb Object irreversible (i.e. “The cat isn’t eating the fish”)<br>SVO reversible: Subject Verb Object reversible (i.e. “The little girl isn’t pushing the boy”)<br>Irreversible (i.e. “The apple is eaten by the little girl”)                                                        |
| Affermative passive items | 10              | Reversible probable (i.e. “The girl is dressed by the mother”)<br>Reversible improbable (i.e. “The dog is being bitten by the boy”)<br>Reversible neutral (i.e. “The dog is being pulled by the man”)                                                                                                                                                                       |
| Negative passive items    | 6               | SV (i.e. “The piano is not played”)<br>SVA irreversible: Subject Verb Agent irreversible (i.e. “The apple isn’t taken by the little girl”)<br>SVA reversible: Subject Verb Agent reversible (i.e. “The boy is not pushed by the girl”)                                                                                                                                      |
| Relative items            | 8               | Embedded (i.e. “The little boy who is on the table is eating the jam”),<br>Right Branching (i.e. “The father is holding the balloon that the little boy is bursting”)                                                                                                                                                                                                       |
| Dative items              | 6               | AAA: Animate-animate-animate (i.e. “The swallow’s taking the worm to the little bird”)<br>AIA: Animate-inanimate-animate (i.e. “The father’s taking the cigarettes to the little boy”)                                                                                                                                                                                      |

Abbreviations: SV: Subject Verb; SVO: Subject Verb Object; SVA: Subject Verb Agent; AAA: Animate Animate Animate; AIA: Animate Inanimate Animate.

**Table 2.** Grid of Analysis of Spontaneous Speech GASS.

| <b>GASS: Grid of Analysis of Spontaneous Speech</b> |                                        |                           |                                         |                                                                                                                                                                                                                                |
|-----------------------------------------------------|----------------------------------------|---------------------------|-----------------------------------------|--------------------------------------------------------------------------------------------------------------------------------------------------------------------------------------------------------------------------------|
| <b>Level</b>                                        | <b>Mean chronological age (months)</b> | <b>Age range (months)</b> | <b>Mean Length of Utterance (words)</b> |                                                                                                                                                                                                                                |
| Level 0                                             | 9                                      | 8-12                      | -                                       | Pre-linguistic stage: spontaneous language production is limited to babbling, sounds, and sporadic single words.                                                                                                               |
| Level 1                                             | 14                                     | 12-18                     | -                                       | Holophrastic stage: true words are few in number but single word utterances begin to be used consistently.                                                                                                                     |
| Level 2                                             | 20                                     | 19-25                     | 1.4                                     | Early combinatorial or presyntactic stage: emergence of two and three word combinations but single word utterances prevail (about 80%).                                                                                        |
| Level 3                                             | 23                                     | 20-26                     | 2.15                                    | Telegraphic or protosyntactic stage: Emergence of subject-verb-object multiword structures that are ungrammatical for omission of free morphemes in most obligatory contexts                                                   |
| Level 4                                             | 27                                     | 24-31                     | 2.6                                     | Grammatical stage one: acquisition of full control of free morphology and basic rules of the main clause in simple sentences; most complex sentences still present omission of free morphemes and subordinate clause functors. |
| Level 5                                             | 31                                     | 28-34                     | 3.1                                     | Grammatical stage two: grammatical control extends to many types of complex sentences with production of well-formed, long and complex sentences.                                                                              |
